# Supplementary material for: Ecofriendly preparation of graphene sheets decorated with an ethylenediamine copper(ii) complex composite modified electrode for the selective detection of hydroquinone in water
Source: Royal Society of Chemistry journal article supplement (doi:10.1039/c7qi00640c), 2017-12-18
Supplement: c7qi00640c1.pdf [file c7qi00640c1.pdf]

### Supporting information

#### **Ecofriendly preparation of graphene sheet decorated with ethylenediamine copper (II) complex composite fabricated electrode for selective detection of hydroquinone in water**

Subramanian Sakthinathan<sup>a</sup>, Thangavelu Kokulnathan<sup>b</sup>, Shen-Ming Chen<sup>\*b</sup> Raj Karthik<sup>b</sup>, Te-Wei Chiu<sup>\*a</sup>

<sup>a</sup>Department of Materials and Mineral Resources Engineering, National Taipei University of Technology, Taipei, 106 Taiwan. Email : [tewei@ntut.edu.tw](mailto:tewei@ntut.edu.tw)

<sup>b</sup>Electroanalysis and Bioelectrochemistry Lab, Department of Chemical Engineering and Biotechnology, National Taipei University of Technology, No.1, Section 3, Chung-Hsiao East Road, Taipei 106, Taiwan (R.O.C). E-mail: [smchen78@ms15.hinet.net](mailto:smchen78@ms15.hinet.net)

#### **Corresponding authors**

Te-Wei Chiu, Fax: +886-2-2731-7185, Tel: +886-2-2771-2171

Email : [tewei@ntut.edu.tw](mailto:tewei@ntut.edu.tw)

S. M. Chen, Fax: +886 2270 25238; Tel: +886 2270 17147

E-mail: [smchen78@ms15.hinet.net](mailto:smchen78@ms15.hinet.net)

#### **S. Figure 1**

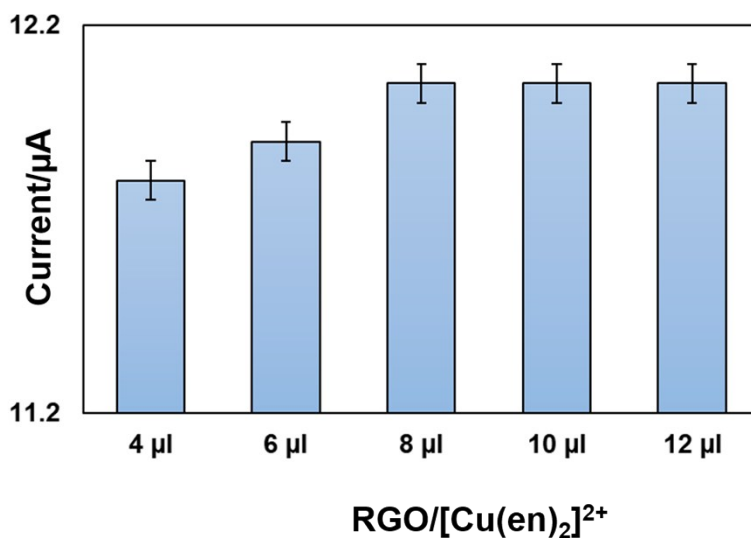

**S. Figure 1** Optimization of loading of RGO/[Cu(en)<sub>2</sub>]<sup>2+</sup> nanocomposite on GCE.

S. Figure 2

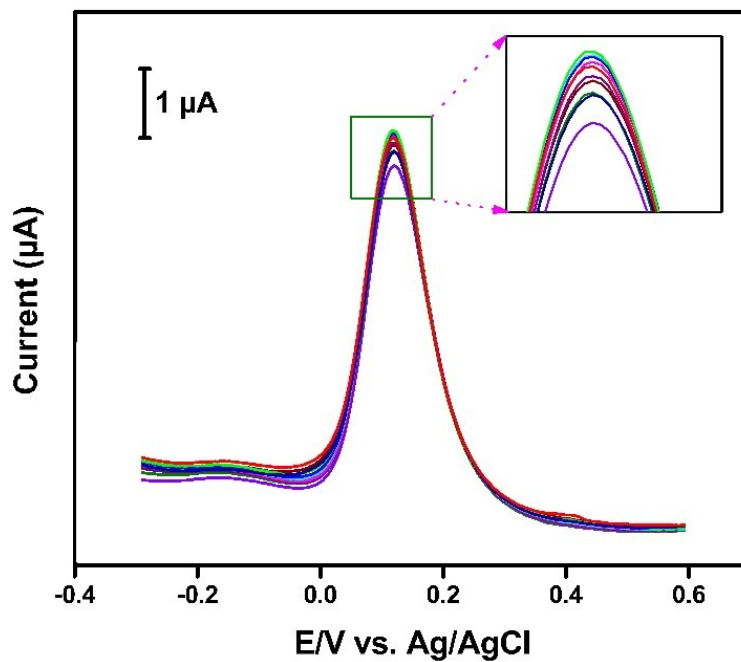

S. Figure 2 Interference studies of the GCE/RGO/[Cu(en)<sub>2</sub>]<sup>2+</sup> modified electrode towards detection of (a) HQ.
